# Supplementary material for: Differential Activation of NRF2 Signaling Pathway in Renal-Cell Carcinoma Caki Cell Lines
Source: MDPI journal article supplement (doi:10.3390/biomedicines11041010), 2023-03-24

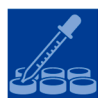

Supplementary Table S1.

| Cell Line | Origin                                                                                                   | Characteristics                                                                                                           |
|-----------|----------------------------------------------------------------------------------------------------------|---------------------------------------------------------------------------------------------------------------------------|
| Caki-1    | Metastatic clear cell renal cell carcinoma cells isolated from skin lesion of 49 year old Caucasian male | Isolated from skin metastatic lesion. Tumorigenic, forms clear cell carcinoma in nude mice consistent with renal primary. |
| Caki-2    | Clear cell carcinoma cells isolated from a 69 year old Caucasian American male primary tumor             | Isolated from a primary tumor. Tumorigenic, forms clear cell carcinoma in nude mice.                                      |

Supplementary Table S2. MS Method Summary

| OT-MS3                   |                   |
|--------------------------|-------------------|
| <b>MS1</b>               |                   |
| mass analyzer            | Orbitrap          |
| resolution               | 120K              |
| scan range               | 400–1400          |
| AGC target               | $4.0 \times 10^5$ |
| max. injection time (ms) | 50                |
| RF lens (%)              | 30                |
| <b>MS2</b>               |                   |
| charge states            | 2–6               |
| mass analyzer            | ion trap          |
| activation type          | CID               |
| dynamic exclusion        | cycle time        |
| isolation window         | 0.4               |
| collision energy         | 35                |
| scan rate/resolution     | turbo             |
| AGC target               | $1.0 \times 10^4$ |
| max. injection time (ms) | 50                |
| <b>MS3</b>               |                   |
| number of SPS ions       | 10                |
| isolation window         | 1.2               |
| activation type          | HCD               |
| collision energy         | 65                |
| mass analyzer            | Orbitrap          |
| scan rate/resolution     | 7.5K              |
| scan range (Th)          | “normal”          |
| AGC target               | $1.5 \times 10^5$ |
| max. injection time (ms) | 150               |

Supplementary Table S3. Antibodies

| Target     | Species           | Vendor                      | Catalogue #  | Dilution |
|------------|-------------------|-----------------------------|--------------|----------|
| AKR1C1     | mouse monoclonal  | Santa Cruz Biotechnology    | sc-166297    | 1:500    |
| AKT        | rabbit polyclonal | Cell Signaling Technologies | Cat. # 9272  | 1:500    |
| p- AKT     | mouse monoclonal  | Cell Signaling Technologies | Cat. # 4051S | 1:500    |
| CAIX (CA9) | mouse monoclonal  | Santa Cruz Biotechnology    | sc-365900    | 1:500    |

|                 |                   |                          |           |          |
|-----------------|-------------------|--------------------------|-----------|----------|
| CAXII (CA12)    | mouse monoclonal  | Santa Cruz Biotechnology | sc-374314 | 1:500    |
| GAPDH           | rabbit polyclonal | Santa Cruz Biotechnology | sc-25778  | 1:1000   |
| HiF1 $\alpha$   | mouse monoclonal  | Santa Cruz Biotechnology | sc-13515  | 1:500    |
| NEFL            | mouse monoclonal  | Santa Cruz Biotechnology | sc-390732 | 1:500    |
| Nrf2            | mouse monoclonal  | Santa Cruz Biotechnology | sc-365949 | 1:500    |
| VHL             | mouse monoclonal  | Santa Cruz Biotechnology | sc-15657  | 1:500    |
| anti-Rabbit IgG | donkey            | LI-COR                   | 926-68073 | 1:20,000 |
| anti-Mouse IgG  | donkey            | LI-COR                   | 926-32212 | 1:20,000 |

Supplementary Table S4. List of differentially expressed proteins between Caki-2 and Caki-1 cells.

Supplementary Table S5.

Enrichment KEGG Pathway database

|    | Accession | Description                         | Size | Overlap | Expected | Fold Enrichment | p-value  | -log <sub>2</sub> (p-Value) |
|----|-----------|-------------------------------------|------|---------|----------|-----------------|----------|-----------------------------|
| 1  | hsa00053  | Ascorbate and aldarate metabolism   | 16   | 8       | 1.3      | 5.95            | 1.67e-05 | 15.87                       |
| 2  | hsa00071  | Fatty acid degradation              | 31   | 11      | 2.6      | 4.22            | 2.41e-05 | 15.34                       |
| 3  | hsa05204  | Chemical carcinogenesis             | 27   | 10      | 2.3      | 4.41            | 3.7e-05  | 14.72                       |
| 4  | hsa00410  | Beta-Alanine metabolism             | 17   | 6       | 1.4      | 4.2             | 0.0019   | 9.04                        |
| 5  | hsa00531  | Glycosaminoglycan degradation       | 8    | 4       | 0.7      | 5.95            | 0.00263  | 8.57                        |
| 6  | hsa00790  | Folate biosynthesis                 | 13   | 5       | 1.1      | 4.57            | 0.00301  | 8.38                        |
| 7  | hsa00340  | Histidine metabolism                | 10   | 4       | 0.8      | 4.76            | 0.00689  | 7.18                        |
| 8  | hsa04061  | Viral protein interaction/cytokines | 11   | 4       | 0.9      | 4.33            | 0.0101   | 6.63                        |
| 9  | hsa00910  | Nitrogen metabolism                 | 7    | 3       | 0.6      | 5.1             | 0.016    | 5.97                        |
| 10 | hsa00604  | Glycosphingolipid biosynthesis      | 4    | 2       | 0.3      | 5.95            | 0.0378   | 4.73                        |

Enrichment Wikipathways database

|    | Accession | Description                            | Size | Overlap | Expected | Fold Enrichment | p-value  | -log <sub>2</sub> (p-Value) |
|----|-----------|----------------------------------------|------|---------|----------|-----------------|----------|-----------------------------|
| 1  | WP98      | Prostaglandin synthesis and regulation | 16   | 10      | 1.3      | 7.43            | 8.27e-08 | 23.53                       |
| 2  | WP696     | Benzo(a)pyrene metabolism              | 6    | 5       | 0.5      | 9.91            | 2.31e-05 | 15.49                       |
| 3  | WP692     | Sulfation biotransformation reaction   | 8    | 5       | 0.7      | 7.43            | 0.000187 | 12.39                       |
| 4  | WP3934    | Leptin and adiponectin                 | 5    | 4       | 0.4      | 9.52            | 0.000231 | 12.08                       |
| 5  | WP1272    | Selenium micronutrient network         | 3    | 3       | 0.3      | 11.9            | 0.000592 | 10.72                       |
| 6  | WP1310    | Selenium micronutrient network         | 3    | 3       | 0.3      | 11.9            | 0.000592 | 10.72                       |
| 7  | WP3891    | Benzene metabolism                     | 2    | 2       | 0.2      | 11.9            | 0.00706  | 7.15                        |
| 8  | WP206     | Fatty acid omega-oxidation             | 2    | 2       | 0.2      | 11.9            | 0.00706  | 7.15                        |
| 9  | WP1080    | Irinotecan pathway                     | 3    | 2       | 0.3      | 7.93            | 0.02     | 5.64                        |
| 10 | WP4228    | Vitamin B6-dependent disorders         | 3    | 2       | 0.3      | 7.93            | 0.02     | 5.64                        |

Enrichment Reactome pathways database

|   | Accession     | Description                       | Size | Overlap | Expected | Fold Enrichment | p-value  | -log <sub>2</sub> (p-Value) |
|---|---------------|-----------------------------------|------|---------|----------|-----------------|----------|-----------------------------|
| 1 | R-HAS-9759194 | Nuclear events mediated by NFE2L2 | 18   | 13      | 1.5      | 8.95            | 6.29e-11 | 33.89                       |

|    |               |                                                             |   |   |     |      |          |       |
|----|---------------|-------------------------------------------------------------|---|---|-----|------|----------|-------|
| 2  | R-HAS-380108  | Chemokine receptors binding chemokines                      | 6 | 4 | 0.5 | 7.83 | 0.000647 | 10.59 |
| 3  | R-HAS-444473  | Formyl peptide receptors binding formyl peptides            | 4 | 3 | 0.3 | 8.92 | 0.00222  | 8.82  |
| 4  | R-HAS-4717374 | Defective DPM1 causes DPM1-CDG                              | 2 | 2 | 0.2 | 11.9 | 0.00706  | 7.15  |
| 5  | R-HAS-163574  | Insulin effects increased synthesis of Xylulose-5-phosphate | 2 | 2 | 0.2 | 11.9 | 0.00706  | 7.15  |
| 6  | R-HAS-162699  | Synthesis of dolichy-phosphate mannose                      | 2 | 2 | 0.2 | 11.9 | 0.00706  | 7.15  |
| 7  | R-HAS-4719360 | Defective DPM3 causes DPM3-CDG                              | 2 | 2 | 0.2 | 11.9 | 0.00706  | 7.15  |
| 8  | R-HAS-4719377 | Defective DPM3 causes DPM3-CDG                              | 2 | 2 | 0.2 | 11.9 | 0.00706  | 7.15  |
| 9  | R-HAS-392154  | Nitric oxide stimulates guanylate cyclase                   | 2 | 2 | 0.2 | 11.9 | 0.00706  | 7.15  |
| 10 | R-HAS-5578999 | Defective GCLC causes HAGGSD                                | 2 | 2 | 0.2 | 11.9 | 0.00706  | 7.15  |

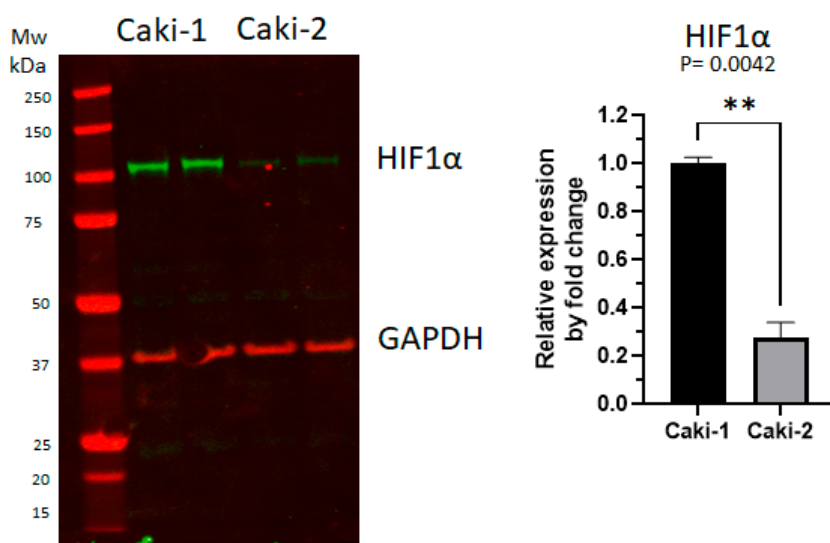

**Supplementary Figure S1. Differential expression of HIF1A in Caki-1 and Caki-2 cells.** Western blot detection of HIF1 $\alpha$  in Caki-1 and Caki-2 cells. GAPDH was used as a loading control and expression fold change of the proteins are based on normalization by individual GAPDH values. HIF1 $\alpha$  is significantly upregulated in Caki-1 compared to Caki-2 cells.

**Supplementary Figure S2.** Data from the Human Protein Atlas demonstrates differential expression of NRF2 in Kidney Renal Clear Cell Carcinoma (KIRC), Kidney Papillary Cell Carcinoma (KIRP), and Kidney Chromophobe Carcinoma (KICH). The survival probabilities scores and 5 year survival rates are shown in panel (A). KIRC, (B) KIRP and, (C) KICH. <https://www.proteinatlas.org/ENSG00000116044-NFE2L2/pathology/renal+cancer>

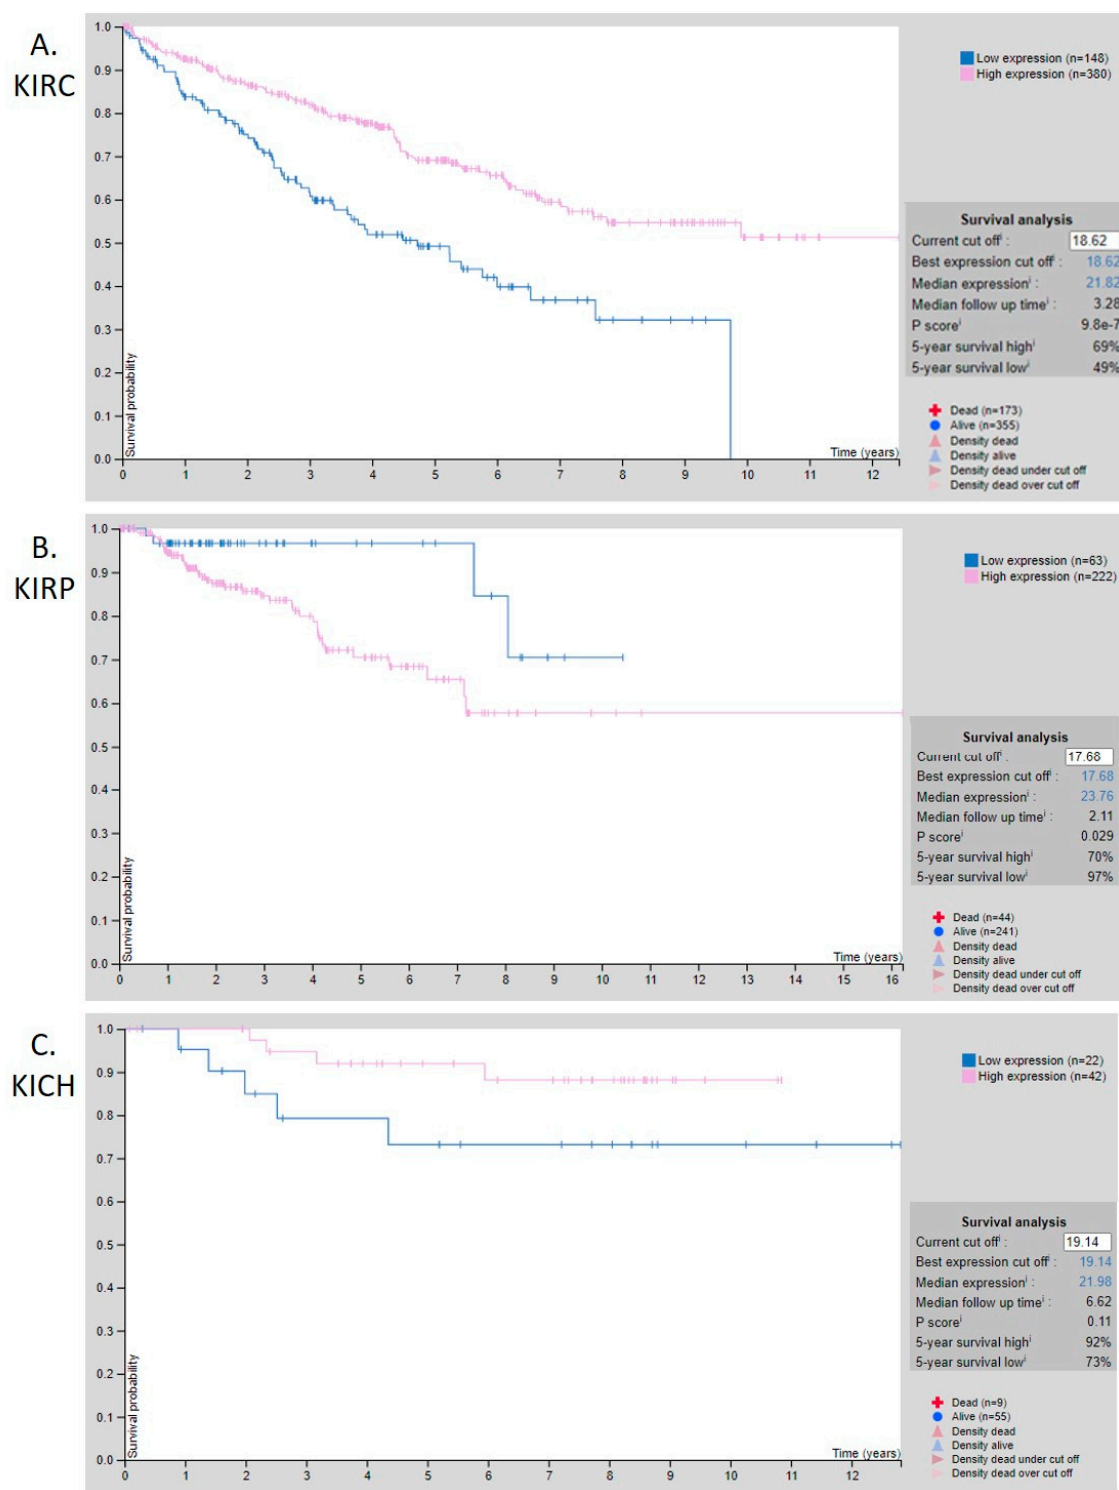

**Supplementary Figure S3. The Cancer Genome Atlas (TCGA) demonstrates differential expression of CA12 in Kidney Renal Clear Cell Carcinoma (KIRC), Kidney Papillary Cell Carcinoma (KIRP), and Kidney Chromophobe Carcinoma (KICH).** The survival probabilities scores and 5 year survival rates are shown in panel (A). KIRC, (B) KIRP and, (C). KICH. Additional CA12 FPKM information for the three tumor types is provided in panel (D).

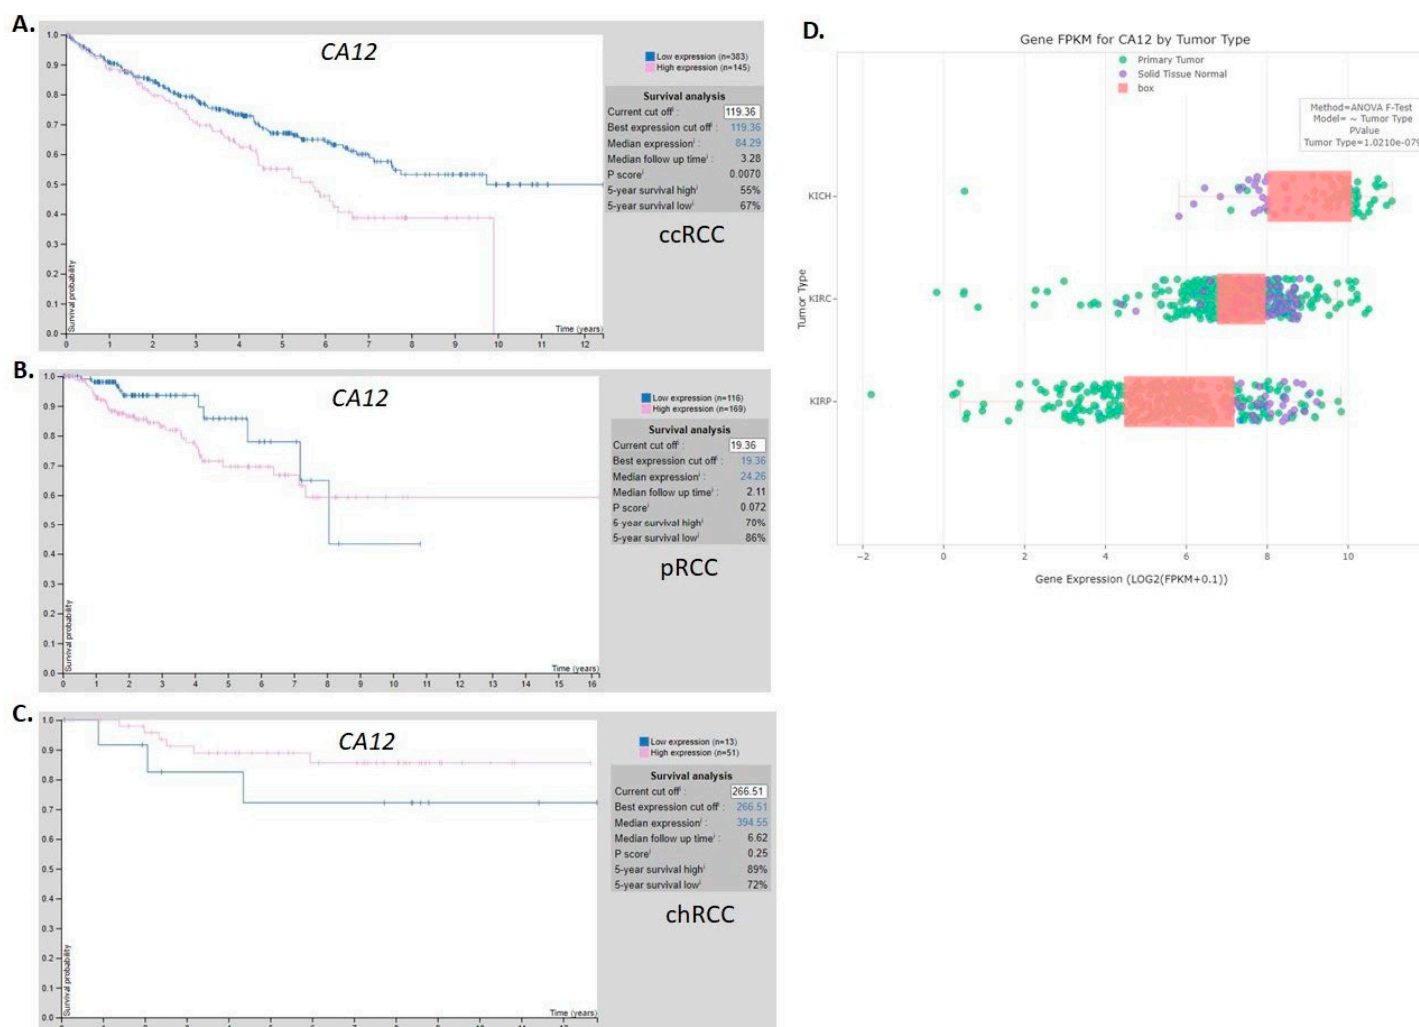

Supplement: s1 [file s1]
