# Supplementary material for: Differential Activation of NRF2 Signaling Pathway in Renal-Cell Carcinoma Caki Cell Lines
Source: Biomedicines. 2023 Mar 24;11(4):1010. doi: 10.3390/biomedicines11041010 (PMC10135738; doi:10.3390/biomedicines11041010)
Supplement: Supplementary file 1 [file biomedicines-11-01010-s001.zip › biomedicines-2248930-supplementary Table S4-excel.xlsx]

## Sheet: Sheet1
Expr Fold Change	ID	Symbol	Entrez Gene Name	Location	Type(s)
-18.519	AASS	AASS	aminoadipate-semialdehyde synthase	Cytoplasm	enzyme
8.787	ABCC2	ABCC2	ATP binding cassette subfamily C member 2	Plasma Membrane	transporter
4.224	ACADS	ACADS	acyl-CoA dehydrogenase short chain	Cytoplasm	enzyme
3.979	ACOT13	ACOT13	acyl-CoA thioesterase 13	Cytoplasm	enzyme
-4.348	ACOX3	ACOX3	acyl-CoA oxidase 3, pristanoyl	Cytoplasm	enzyme
-3.067	ACSL4	ACSL4	acyl-CoA synthetase long chain family member 4	Cytoplasm	enzyme
2.674	ACTN4	ACTN4	actinin alpha 4	Cytoplasm	transcription regulator
-33.333	ADAMTSL1	ADAMTSL1	ADAMTS like 1	Extracellular Space	other
9.745	ADGRG2	ADGRG2	adhesion G protein-coupled receptor G2	Plasma Membrane	G-protein coupled receptor
-4.831	AFAP1L2	AFAP1L2	actin filament associated protein 1 like 2	Cytoplasm	other
4.498	AGFG2	AGFG2	ArfGAP with FG repeats 2	Other	other
5.195	AK4	AK4	adenylate kinase 4	Cytoplasm	kinase
5.09	AK5	AK5	adenylate kinase 5	Cytoplasm	kinase
10.231	AKAP12	AKAP12	A-kinase anchoring protein 12	Cytoplasm	transporter
2.69	AKR1A1	AKR1A1	aldo-keto reductase family 1 member A1	Cytoplasm	enzyme
26.012	AKR1B10	AKR1B10	aldo-keto reductase family 1 member B10	Cytoplasm	enzyme
37.66	AKR1C2	AKR1C1/AKR1C2	aldo-keto reductase family 1 member C2	Cytoplasm	enzyme
13.896	AKR1C1	AKR1C1/AKR1C2	aldo-keto reductase family 1 member C2	Cytoplasm	enzyme
6.812	AKR1C3	AKR1C3	aldo-keto reductase family 1 member C3	Cytoplasm	enzyme
11.86	ALDH1A1	ALDH1A1	aldehyde dehydrogenase 1 family member A1	Cytoplasm	enzyme
6.617	ALDH1A3	ALDH1A3	aldehyde dehydrogenase 1 family member A3	Cytoplasm	enzyme
-4.785	ALDH1L2	ALDH1L2	aldehyde dehydrogenase 1 family member L2	Cytoplasm	enzyme
4.108	ALDH3A2	ALDH3A2	aldehyde dehydrogenase 3 family member A2	Cytoplasm	enzyme
3.753	ALDH5A1	ALDH5A1	aldehyde dehydrogenase 5 family member A1	Cytoplasm	enzyme
4.997	ALDOC	ALDOC	aldolase, fructose-bisphosphate C	Cytoplasm	enzyme
-6.289	ANGPTL4	ANGPTL4	angiopoietin like 4	Extracellular Space	other
12.172	ANKRD44	ANKRD44	ankyrin repeat domain 44	Other	other
-16.667	ANPEP	ANPEP	alanyl aminopeptidase, membrane	Plasma Membrane	peptidase
3.167	ANXA4	ANXA4	annexin A4	Plasma Membrane	other
-3.247	ANXA6	ANXA6	annexin A6	Plasma Membrane	ion channel
-6.494	APIP	APIP	APAF1 interacting protein	Cytoplasm	enzyme
5.538	APOBEC3F	APOBEC3F	apolipoprotein B mRNA editing enzyme catalytic subunit 3F	Cytoplasm	enzyme
3.11	APP	APP	amyloid beta precursor protein	Plasma Membrane	other
-4.274	ASAH1	ASAH1	N-acylsphingosine amidohydrolase 1	Cytoplasm	enzyme
8.842	ASS1	ASS1	argininosuccinate synthase 1	Cytoplasm	enzyme
-4.049	ATP2B4	ATP2B4	ATPase plasma membrane Ca2+ transporting 4	Plasma Membrane	transporter
4.353	B3GALT5	B3GALT5	beta-1,3-galactosyltransferase 5	Cytoplasm	enzyme
3.55	BAG2	BAG2	BAG cochaperone 2	Cytoplasm	other
-25	BASP1	BASP1	brain abundant membrane attached signal protein 1	Nucleus	transcription regulator
9.57	BCAM	BCAM	basal cell adhesion molecule (Lutheran blood group)	Plasma Membrane	transmembrane receptor
-22.222	BCAT1	BCAT1	branched chain amino acid transaminase 1	Cytoplasm	enzyme
3.448	BLVRB	BLVRB	biliverdin reductase B	Cytoplasm	enzyme
-8.197	C3	C3	complement C3	Extracellular Space	peptidase
28.951	CA12	CA12	carbonic anhydrase 12	Plasma Membrane	enzyme
-37.037	CA3	CA3	carbonic anhydrase 3	Cytoplasm	enzyme
13.122	CA8	CA8	carbonic anhydrase 8	Cytoplasm	enzyme
-8.065	CALD1	CALD1	caldesmon 1	Cytoplasm	other
5.729	CBR1	CBR1	carbonyl reductase 1	Cytoplasm	enzyme
8.843	CCN2	CCN2	cellular communication network factor 2	Extracellular Space	growth factor
-3.534	CDC42BPB	CDC42BPB	CDC42 binding protein kinase beta	Cytoplasm	kinase
4.542	CGAS	CGAS	cyclic GMP-AMP synthase	Cytoplasm	enzyme
4.401	CMBL	CMBL	carboxymethylenebutenolidase homolog	Cytoplasm	enzyme
-3.846	CMC2	CMC2	C-X9-C motif containing 2	Cytoplasm	other
4.874	CPPED1	CPPED1	calcineurin like phosphoesterase domain containing 1	Cytoplasm	enzyme
4.922	CRIP2	CRIP2	cysteine rich protein 2	Nucleus	other
6.153	CRYBG1	CRYBG1	crystallin beta-gamma domain containing 1	Extracellular Space	other
4.441	CRYM	CRYM	crystallin mu	Cytoplasm	enzyme
4.719	CSTB	CSTB	cystatin B	Cytoplasm	peptidase
-5.682	CTSB	CTSB	cathepsin B	Cytoplasm	peptidase
-11.111	CTSS	CTSS	cathepsin S	Cytoplasm	peptidase
-17.241	CXCL1	CXCL1	C-X-C motif chemokine ligand 1	Extracellular Space	cytokine
-30.303	CXCL6	CXCL6	C-X-C motif chemokine ligand 6	Extracellular Space	cytokine
-11.628	CYBA	CYBA	cytochrome b-245 alpha chain	Cytoplasm	enzyme
23.136	CYP2S1	CYP2S1	cytochrome P450 family 2 subfamily S member 1	Cytoplasm	enzyme
16.006	CYP4F11	CYP4F11	cytochrome P450 family 4 subfamily F member 11	Cytoplasm	enzyme
-5.291	DAB2	DAB2	DAB adaptor protein 2	Plasma Membrane	other
-5.848	DCAF8	DCAF8	DDB1 and CUL4 associated factor 8	Nucleus	other
14.17	DDX3Y	DDX3Y	DEAD-box helicase 3 Y-linked	Cytoplasm	enzyme
5.416	DHCR24	DHCR24	24-dehydrocholesterol reductase	Cytoplasm	enzyme
10.511	DHRS3	DHRS3	dehydrogenase/reductase 3	Cytoplasm	enzyme
3.463	DNAJB4	DNAJB4	DnaJ heat shock protein family (Hsp40) member B4	Nucleus	other
3.459	DPP4	DPP4	dipeptidyl peptidase 4	Plasma Membrane	peptidase
4.021	DSP	DSP	desmoplakin	Plasma Membrane	other
2.991	DSTN	DSTN	destrin, actin depolymerizing factor	Cytoplasm	other
2.878	ECH1	ECH1	enoyl-CoA hydratase 1	Cytoplasm	enzyme
7.624	EDIL3	EDIL3	EGF like repeats and discoidin domains 3	Extracellular Space	other
-3.571	EEA1	EEA1	early endosome antigen 1	Cytoplasm	other
-3.937	ENG	ENG	endoglin	Plasma Membrane	transmembrane receptor
3.693	ENO2	ENO2	enolase 2	Cytoplasm	enzyme
9.304	ENTPD5	ENTPD5	ectonucleoside triphosphate diphosphohydrolase 5 (inactive)	Cytoplasm	enzyme
-5.814	EPHB2	EPHB2	EPH receptor B2	Plasma Membrane	kinase
4.344	EPHX1	EPHX1	epoxide hydrolase 1	Cytoplasm	peptidase
3.588	EPS8	EPS8	epidermal growth factor receptor pathway substrate 8	Plasma Membrane	peptidase
-5.78	EREG	EREG	epiregulin	Extracellular Space	growth factor
8.03	ETHE1	ETHE1	ETHE1 persulfide dioxygenase	Cytoplasm	enzyme
-9.804	F11R	F11R	F11 receptor	Plasma Membrane	other
24.132	FABP6	FABP6	fatty acid binding protein 6	Cytoplasm	transporter
8.831	FAM107B	FAM107B	family with sequence similarity 107 member B	Other	other
-5.263	FBLN1	FBLN1	fibulin 1	Extracellular Space	other
-3.195	FBN1	FBN1	fibrillin 1	Extracellular Space	other
-25	FBN2	FBN2	fibrillin 2	Extracellular Space	other
-6.25	FGF2	FGF2	fibroblast growth factor 2	Extracellular Space	growth factor
-4.184	FHOD1	FHOD1	formin homology 2 domain containing 1	Cytoplasm	other
3.368	FLNB	FLNB	filamin B	Cytoplasm	other
-16.129	FLNC	FLNC	filamin C	Cytoplasm	other
-3.745	FN1	FN1	fibronectin 1	Extracellular Space	enzyme
3.63	FNBP1	FNBP1	formin binding protein 1	Nucleus	enzyme
3.241	FSCN1	FSCN1	fascin actin-bundling protein 1	Cytoplasm	other
6.412	FXYD2	FXYD2	FXYD domain containing ion transport regulator 2	Plasma Membrane	ion channel
4.398	G6PD	G6PD	glucose-6-phosphate dehydrogenase	Cytoplasm	enzyme
10.265	GAL3ST1	GAL3ST1	galactose-3-O-sulfotransferase 1	Cytoplasm	enzyme
9.462	GALM	GALM	galactose mutarotase	Cytoplasm	enzyme
-3.46	GALNT2	GALNT2	polypeptide N-acetylgalactosaminyltransferase 2	Cytoplasm	enzyme
3.571	GASK1B	GASK1B	golgi associated kinase 1B	Cytoplasm	other
-3.546	GBP2	GBP2	guanylate binding protein 2	Cytoplasm	enzyme
4.154	GCLC	GCLC	glutamate-cysteine ligase catalytic subunit	Cytoplasm	enzyme
4.132	GCLM	GCLM	glutamate-cysteine ligase modifier subunit	Cytoplasm	enzyme
4.424	GGT1	GGT1	gamma-glutamyltransferase 1	Plasma Membrane	enzyme
16.902	GLDC	GLDC	glycine decarboxylase	Cytoplasm	enzyme
-5.525	GLG1	GLG1	golgi glycoprotein 1	Cytoplasm	other
3.223	GPI	GPI	glucose-6-phosphate isomerase	Extracellular Space	enzyme
5.74	GPNMB	GPNMB	glycoprotein nmb	Plasma Membrane	enzyme
5.532	GPRC5A	GPRC5A	G protein-coupled receptor class C group 5 member A	Plasma Membrane	G-protein coupled receptor
-5.747	GSN	GSN	gelsolin	Extracellular Space	other
3.194	GSR	GSR	glutathione-disulfide reductase	Cytoplasm	enzyme
3.493	GSTM3	GSTM3	glutathione S-transferase mu 3	Cytoplasm	enzyme
-4.673	GSTO1	GSTO1	glutathione S-transferase omega 1	Cytoplasm	enzyme
-19.231	GSTP1	GSTP1	glutathione S-transferase pi 1	Cytoplasm	enzyme
10.742	GUCY1A1	GUCY1A1	guanylate cyclase 1 soluble subunit alpha 1	Cytoplasm	enzyme
3.449	GUSB	GUSB	glucuronidase beta	Cytoplasm	enzyme
-3.289	H1-5	H1-5	H1.5 linker histone, cluster member	Nucleus	other
7.75	HINT2	HINT2	histidine triad nucleotide binding protein 2	Cytoplasm	enzyme
3.957	HIP1R	HIP1R	huntingtin interacting protein 1 related	Cytoplasm	other
2.549	HK2	HK2	hexokinase 2	Cytoplasm	kinase
8.157	HLA-C	HLA-C	major histocompatibility complex, class I, C	Plasma Membrane	other
-6.993	HMGA2	HMGA2	high mobility group AT-hook 2	Nucleus	enzyme
3.465	HSD17B11	HSD17B11	hydroxysteroid 17-beta dehydrogenase 11	Cytoplasm	enzyme
5.344	HSPA2	HSPA2	heat shock protein family A (Hsp70) member 2	Cytoplasm	other
-4.237	IFI16	IFI16	interferon gamma inducible protein 16	Nucleus	transcription regulator
-32.258	IGF2BP1	IGF2BP1	insulin like growth factor 2 mRNA binding protein 1	Cytoplasm	translation regulator
-3.546	IGF2R	IGF2R	insulin like growth factor 2 receptor	Plasma Membrane	transmembrane receptor
8.123	ITGB3	ITGB3	integrin subunit beta 3	Plasma Membrane	transmembrane receptor
3.99	ITPR3	ITPR3	inositol 1,4,5-trisphosphate receptor type 3	Cytoplasm	ion channel
3.38	IVNS1ABP	IVNS1ABP	influenza virus NS1A binding protein	Nucleus	other
5.781	JCAD	JCAD	junctional cadherin 5 associated	Plasma Membrane	other
3.705	KIFC1	KIFC1	kinesin family member C1	Nucleus	enzyme
4.804	KRT19	KRT19	keratin 19	Cytoplasm	other
11.916	KRT20	KRT20	keratin 20	Cytoplasm	other
2.797	KTN1	KTN1	kinectin 1	Plasma Membrane	transmembrane receptor
12.274	KYNU	KYNU	kynureninase	Cytoplasm	enzyme
7.177	L1CAM	L1CAM	L1 cell adhesion molecule	Plasma Membrane	other
2.666	LGALS1	LGALS1	galectin 1	Extracellular Space	other
3.069	LGALS3	LGALS3	galectin 3	Extracellular Space	other
3.749	LHPP	LHPP	phospholysine phosphohistidine inorganic pyrophosphate phosphatase	Cytoplasm	phosphatase
-3.344	LPP	LPP	LIM domain containing preferred translocation partner in lipoma	Nucleus	other
-7.874	LPXN	LPXN	leupaxin	Cytoplasm	transcription regulator
6.283	LRATD2	LRATD2	LRAT domain containing 2	Plasma Membrane	other
3.546	LXN	LXN	latexin	Cytoplasm	other
4.255	MAOB	MAOB	monoamine oxidase B	Cytoplasm	enzyme
8.063	MAP2	MAP2	microtubule associated protein 2	Plasma Membrane	other
6.998	MAP7	MAP7	microtubule associated protein 7	Cytoplasm	other
-4.926	MARCKSL1	MARCKSL1	MARCKS like 1	Cytoplasm	other
3.582	MCU	MCU	mitochondrial calcium uniporter	Cytoplasm	ion channel
14.332	MELTF	MELTF	melanotransferrin	Plasma Membrane	other
3.401	MFGE8	MFGE8	milk fat globule EGF and factor V/VIII domain containing	Extracellular Space	other
4.706	MRI1	MRI1	methylthioribose-1-phosphate isomerase 1	Cytoplasm	translation regulator
3.773	MTMR10	MTMR10	myotubularin related protein 10	Cytoplasm	other
15.252	MYH14	MYH14	myosin heavy chain 14	Extracellular Space	enzyme
16.742	NAPRT	NAPRT	nicotinate phosphoribosyltransferase	Cytoplasm	enzyme
17.122	NEFL	NEFL	neurofilament light chain	Cytoplasm	other
4.125	NF2	NF2	NF2, moesin-ezrin-radixin like (MERLIN) tumor suppressor	Plasma Membrane	other
-12.987	NNMT	NNMT	nicotinamide N-methyltransferase	Cytoplasm	enzyme
7.437	NQO1	NQO1	NAD(P)H quinone dehydrogenase 1	Cytoplasm	enzyme
11.944	NR0B1	NR0B1	nuclear receptor subfamily 0 group B member 1	Nucleus	ligand-dependent nuclear receptor
-3.922	NRP1	NRP1	neuropilin 1	Plasma Membrane	transmembrane receptor
4.702	OSBPL10	OSBPL10	oxysterol binding protein like 10	Cytoplasm	transporter
3.067	PACSIN2	PACSIN2	protein kinase C and casein kinase substrate in neurons 2	Cytoplasm	other
5.71	PADI3	PADI3	peptidyl arginine deiminase 3	Cytoplasm	enzyme
2.813	PALLD	PALLD	palladin, cytoskeletal associated protein	Plasma Membrane	other
2.989	PARD6B	PARD6B	par-6 family cell polarity regulator beta	Plasma Membrane	other
-7.752	PARK7	PARK7	Parkinsonism associated deglycase	Nucleus	enzyme
3.8	PDXK	PDXK	pyridoxal kinase	Cytoplasm	kinase
25.48	PDZK1	PDZK1	PDZ domain containing 1	Plasma Membrane	other
3.272	PFKL	PFKL	phosphofructokinase, liver type	Cytoplasm	kinase
4.093	PHYH	PHYH	phytanoyl-CoA 2-hydroxylase	Cytoplasm	enzyme
-4.717	PIK3AP1	PIK3AP1	phosphoinositide-3-kinase adaptor protein 1	Cytoplasm	other
3.367	PISD	PISD	phosphatidylserine decarboxylase	Cytoplasm	enzyme
4.958	PKP3	PKP3	plakophilin 3	Plasma Membrane	other
-3.597	PLAU	PLAU	plasminogen activator, urokinase	Extracellular Space	peptidase
-6.25	PLIN2	PLIN2	perilipin 2	Plasma Membrane	other
5.544	PM20D2	PM20D2	peptidase M20 domain containing 2	Nucleus	peptidase
-4.065	POGLUT2	POGLUT2	protein O-glucosyltransferase 2	Cytoplasm	enzyme
3.007	POR	POR	cytochrome p450 oxidoreductase	Cytoplasm	enzyme
-27.778	PRDX2	PRDX2	peroxiredoxin 2	Cytoplasm	enzyme
-4.545	PROCR	PROCR	protein C receptor	Plasma Membrane	other
-4.464	PTGFRN	PTGFRN	prostaglandin F2 receptor inhibitor	Plasma Membrane	other
10.588	PYCARD	PYCARD	PYD and CARD domain containing	Cytoplasm	transcription regulator
-6.897	QSOX1	QSOX1	quiescin sulfhydryl oxidase 1	Cytoplasm	enzyme
5.408	RASAL1	RASAL1	RAS protein activator like 1	Cytoplasm	other
8.902	RDH10	RDH10	retinol dehydrogenase 10	Nucleus	enzyme
5.369	RHPN2	RHPN2	rhophilin Rho GTPase binding protein 2	Cytoplasm	other
-4.566	RNASET2	RNASET2	ribonuclease T2	Cytoplasm	enzyme
5.573	RTKN	RTKN	rhotekin	Cytoplasm	other
-4.854	SCRN1	SCRN1	secernin 1	Cytoplasm	other
-4.098	SEMA3C	SEMA3C	semaphorin 3C	Extracellular Space	other
19.572	SERPINB5	SERPINB5	serpin family B member 5	Extracellular Space	other
-19.608	SERPINE1	SERPINE1	serpin family E member 1	Extracellular Space	other
-10.526	SERPINH1	SERPINH1	serpin family H member 1	Extracellular Space	other
21.316	SFN	SFN	stratifin	Cytoplasm	other
3.754	SLC27A3	SLC27A3	solute carrier family 27 member 3	Cytoplasm	transporter
3.576	SLC2A1	SLC2A1	solute carrier family 2 member 1	Plasma Membrane	transporter
4.657	SLC48A1	SLC48A1	solute carrier family 48 member 1	Cytoplasm	transporter
7.999	SLC7A11	SLC7A11	solute carrier family 7 member 11	Plasma Membrane	transporter
-5.208	SLC9A3R1	SLC9A3R1	SLC9A3 regulator 1	Plasma Membrane	transporter
22.877	SNCG	SNCG	synuclein gamma	Cytoplasm	other
-4.167	SOD2	SOD2	superoxide dismutase 2	Cytoplasm	enzyme
-3.891	SPARC	SPARC	secreted protein acidic and cysteine rich	Extracellular Space	other
21.13	SPINT2	SPINT2	serine peptidase inhibitor, Kunitz type 2	Extracellular Space	other
3.252	SPP1	SPP1	secreted phosphoprotein 1	Extracellular Space	cytokine
4.09	SQSTM1	SQSTM1	sequestosome 1	Cytoplasm	transcription regulator
3.706	SRC	SRC	SRC proto-oncogene, non-receptor tyrosine kinase	Cytoplasm	kinase
3.834	SRXN1	SRXN1	sulfiredoxin 1	Cytoplasm	enzyme
9.982	SULT1A1	SULT1A1	sulfotransferase family 1A member 1	Cytoplasm	enzyme
3.795	SULT1C2	SULT1C2	sulfotransferase family 1C member 2	Cytoplasm	enzyme
-3.759	SYNPO	SYNPO	synaptopodin	Cytoplasm	other
-16.393	TAGLN	TAGLN	transgelin	Cytoplasm	other
3.331	TALDO1	TALDO1	transaldolase 1	Cytoplasm	enzyme
-4.386	TANC2	TANC2	tetratricopeptide repeat, ankyrin repeat and coiled-coil containing 2	Nucleus	transcription regulator
-50	TCEAL3	TCEAL3	transcription elongation factor A like 3	Other	other
2.936	TECR	TECR	trans-2,3-enoyl-CoA reductase	Plasma Membrane	enzyme
3.898	TENM3	TENM3	teneurin transmembrane protein 3	Plasma Membrane	other
-7.042	TFPI	TFPI	tissue factor pathway inhibitor	Extracellular Space	other
-10.526	TGFBI	TGFBI	transforming growth factor beta induced	Extracellular Space	other
-5.025	THYN1	THYN1	thymocyte nuclear protein 1	Nucleus	other
3.34	TMEM205	TMEM205	transmembrane protein 205	Cytoplasm	other
4.689	TMOD1	TMOD1	tropomodulin 1	Cytoplasm	enzyme
-13.889	TNC	TNC	tenascin C	Extracellular Space	other
5.086	TNIK	TNIK	TRAF2 and NCK interacting kinase	Plasma Membrane	kinase
5.554	TP53I3	TP53I3	tumor protein p53 inducible protein 3	Cytoplasm	enzyme
3.596	TPD52L1	TPD52L1	TPD52 like 1	Cytoplasm	other
-37.037	TPM2	TPM2	tropomyosin 2	Extracellular Space	other
27.533	TPPP3	TPPP3	tubulin polymerization promoting protein family member 3	Cytoplasm	other
-21.277	TRIM22	TRIM22	tripartite motif containing 22	Cytoplasm	transcription regulator
4.182	TRIOBP	TRIOBP	TRIO and F-actin binding protein	Nucleus	other
6.392	TXN	TXN	thioredoxin	Cytoplasm	enzyme
3.135	TXNRD1	TXNRD1	thioredoxin reductase 1	Cytoplasm	enzyme
16.403	TYMP	TYMP	thymidine phosphorylase	Extracellular Space	growth factor
-4.032	UAP1	UAP1	UDP-N-acetylglucosamine pyrophosphorylase 1	Nucleus	enzyme
4.015	UGDH	UGDH	UDP-glucose 6-dehydrogenase	Nucleus	enzyme
7.644	UGT1A9	UGT1A9 (includes others)	UDP glucuronosyltransferase family 1 member A10	Cytoplasm	enzyme
5.922	UGT1A7	UGT1A9 (includes others)	UDP glucuronosyltransferase family 1 member A10	Cytoplasm	enzyme
-3.135	USP14	USP14	ubiquitin specific peptidase 14	Cytoplasm	peptidase
3.297	UXS1	UXS1	UDP-glucuronate decarboxylase 1	Cytoplasm	enzyme
-30.303	VAMP5	VAMP5	vesicle associated membrane protein 5	Plasma Membrane	transporter
-16.667	VCAM1	VCAM1	vascular cell adhesion molecule 1	Plasma Membrane	transmembrane receptor
-3.367	VCAN	VCAN	versican	Extracellular Space	other
8.599	VSNL1	VSNL1	visinin like 1	Cytoplasm	other
-4.255	WBP2	WBP2	WW domain binding protein 2	Cytoplasm	transcription regulator
-33.333	YLPM1	YLPM1	YLP motif containing 1	Nucleus	transcription regulator
